# Supplementary material for: MWCNT-driven modulation of thermal and flow properties in PTT/PP polymer systems
Source: Royal Society of Chemistry journal article supplement (doi:10.1039/d5lp00324e), 2025-12-16

Supplementary data S2 :

TEM images of Nanocyl NC 7000( as received from the supplier's material data sheet

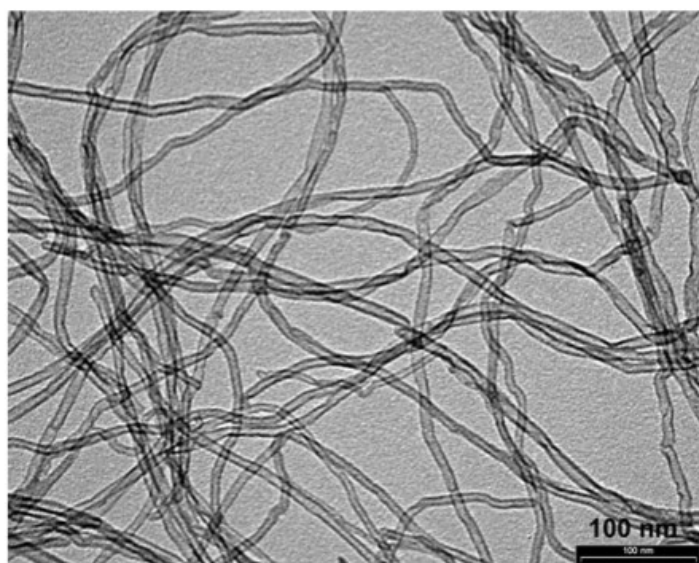

Supplement: d5lp00324e1.pdf [file d5lp00324e1.pdf]
